# Supplementary material for: Sigflow: an automated and comprehensive pipeline for cancer genome mutational signature analysis
Source: PubMed Central journal article supplement — Bioinformatics. 2020 Oct 17;37(11):1590–2. doi: 10.1093/bioinformatics/btaa895 (PMC8275980; doi:10.1093/bioinformatics/btaa895), 2020-10-17
Supplement: btaa895_supplementary_data.pdf [file btaa895_supplementary_data.pdf]

Table S1

| Tool                                                                                                                                                                                                                                                                                                                                                                                                             |                                          | Sigflow                                                                                       | SigProfiler                                                                                                               | SomaticSignatures                                                                                                   | MutationalPatterns                                                                                                  | deconstructSigs                                                                                         |
|------------------------------------------------------------------------------------------------------------------------------------------------------------------------------------------------------------------------------------------------------------------------------------------------------------------------------------------------------------------------------------------------------------------|------------------------------------------|-----------------------------------------------------------------------------------------------|---------------------------------------------------------------------------------------------------------------------------|---------------------------------------------------------------------------------------------------------------------|---------------------------------------------------------------------------------------------------------------------|---------------------------------------------------------------------------------------------------------|
| Support signature type                                                                                                                                                                                                                                                                                                                                                                                           | SBS                                      | Yes                                                                                           | Yes                                                                                                                       | Yes                                                                                                                 | Yes                                                                                                                 | Yes                                                                                                     |
|                                                                                                                                                                                                                                                                                                                                                                                                                  | DBS                                      | Yes                                                                                           | Yes                                                                                                                       | No                                                                                                                  | No                                                                                                                  | Yes                                                                                                     |
|                                                                                                                                                                                                                                                                                                                                                                                                                  | INDEL                                    | Yes                                                                                           | Yes                                                                                                                       | No                                                                                                                  | No                                                                                                                  | No                                                                                                      |
|                                                                                                                                                                                                                                                                                                                                                                                                                  | CN                                       | Yes                                                                                           | No                                                                                                                        | No                                                                                                                  | No                                                                                                                  | No                                                                                                      |
| Has CLI                                                                                                                                                                                                                                                                                                                                                                                                          |                                          | Yes                                                                                           | No                                                                                                                        | No                                                                                                                  | No                                                                                                                  | No                                                                                                      |
| Platform                                                                                                                                                                                                                                                                                                                                                                                                         |                                          | R                                                                                             | Python                                                                                                                    | R                                                                                                                   | R                                                                                                                   | R                                                                                                       |
| Analysis features                                                                                                                                                                                                                                                                                                                                                                                                | Manual extraction                        | Yes                                                                                           | No                                                                                                                        | Yes                                                                                                                 | Yes                                                                                                                 | No                                                                                                      |
|                                                                                                                                                                                                                                                                                                                                                                                                                  | Auto extraction                          | Yes                                                                                           | Yes                                                                                                                       | No                                                                                                                  | No                                                                                                                  | No                                                                                                      |
|                                                                                                                                                                                                                                                                                                                                                                                                                  | Refit after extraction                   | Yes                                                                                           | Yes                                                                                                                       | No                                                                                                                  | No                                                                                                                  | No                                                                                                      |
|                                                                                                                                                                                                                                                                                                                                                                                                                  | Reference signature fitting (efficiency) | Yes (fast)                                                                                    | No                                                                                                                        | No                                                                                                                  | Yes (fast)                                                                                                          | Yes (slow)                                                                                              |
|                                                                                                                                                                                                                                                                                                                                                                                                                  | Batch signature fitting                  | Yes                                                                                           | No                                                                                                                        | No                                                                                                                  | Yes                                                                                                                 | No                                                                                                      |
|                                                                                                                                                                                                                                                                                                                                                                                                                  | Signature stability analysis             | Yes                                                                                           | No                                                                                                                        | No                                                                                                                  | No                                                                                                                  | No                                                                                                      |
|                                                                                                                                                                                                                                                                                                                                                                                                                  | Visualization                            | Yes                                                                                           | Yes                                                                                                                       | Yes                                                                                                                 | Yes                                                                                                                 | Yes                                                                                                     |
| Extensible                                                                                                                                                                                                                                                                                                                                                                                                       |                                          | Yes                                                                                           | Yes                                                                                                                       | No                                                                                                                  | No                                                                                                                  | No                                                                                                      |
| Core methods                                                                                                                                                                                                                                                                                                                                                                                                     |                                          | NMF/Bayesian<br>NMF/QP/NNLS                                                                   | NMF/NNLS                                                                                                                  | NMF/PCA                                                                                                             | NMF/NNLS                                                                                                            | NNLS                                                                                                    |
| Signature quantification                                                                                                                                                                                                                                                                                                                                                                                         | Relative exposure                        | Yes                                                                                           | No                                                                                                                        | No                                                                                                                  | Yes                                                                                                                 | Yes                                                                                                     |
|                                                                                                                                                                                                                                                                                                                                                                                                                  | Absolute exposure                        | Yes                                                                                           | Yes                                                                                                                       | No                                                                                                                  | Yes                                                                                                                 | No                                                                                                      |
| Input format                                                                                                                                                                                                                                                                                                                                                                                                     |                                          | VCF/MAF/CSV/E<br>XCEL                                                                         | VCF/MAF/CSV                                                                                                               | VCF/R matrix/R<br>Vranges object                                                                                    | VCF/R matrix                                                                                                        | Custom mutation file                                                                                    |
| Software URL                                                                                                                                                                                                                                                                                                                                                                                                     |                                          | <a href="https://github.com/ShixiangWang/sigflow">https://github.com/ShixiangWang/sigflow</a> | <a href="https://github.com/AlexandrovLab/SigProfilerExtractor">https://github.com/AlexandrovLab/SigProfilerExtractor</a> | <a href="https://github.com/juliangehring/SomaticSignatures">https://github.com/juliangehring/SomaticSignatures</a> | <a href="https://github.com/UMCUGenetics/MutationalPatterns">https://github.com/UMCUGenetics/MutationalPatterns</a> | <a href="https://github.com/raerose01/deconstructSigs">https://github.com/raerose01/deconstructSigs</a> |
| Abbr.: SBS for single base substitution; DBS for doublet base substitution; INDEL for short insertions and deletions; CN for copy number; SV for structure variation; CLI for command line interface; NMF for non-negative factorization; QP for quadratic programming; NNLS for nonnegative least square; PCA for principal component analysis; VCF for variant call format; MAF for mutation annotation format |                                          |                                                                                               |                                                                                                                           |                                                                                                                     |                                                                                                                     |                                                                                                         |

Table S1. Comparisons between Sigflow and other mutational signature analysis tools. Note: “Refit after extraction” means signature fitting with signatures from de-novo extraction, and this could optimize the exposures of extracted signatures. “Batch signature fitting” means signature fitting in multiple samples simultaneously. “Relative exposure” means relative mutation proportion contributed by a signature in a tumor. “Absolute exposure” means mutation counts contributed by a signature in a tumor.

Figure S1

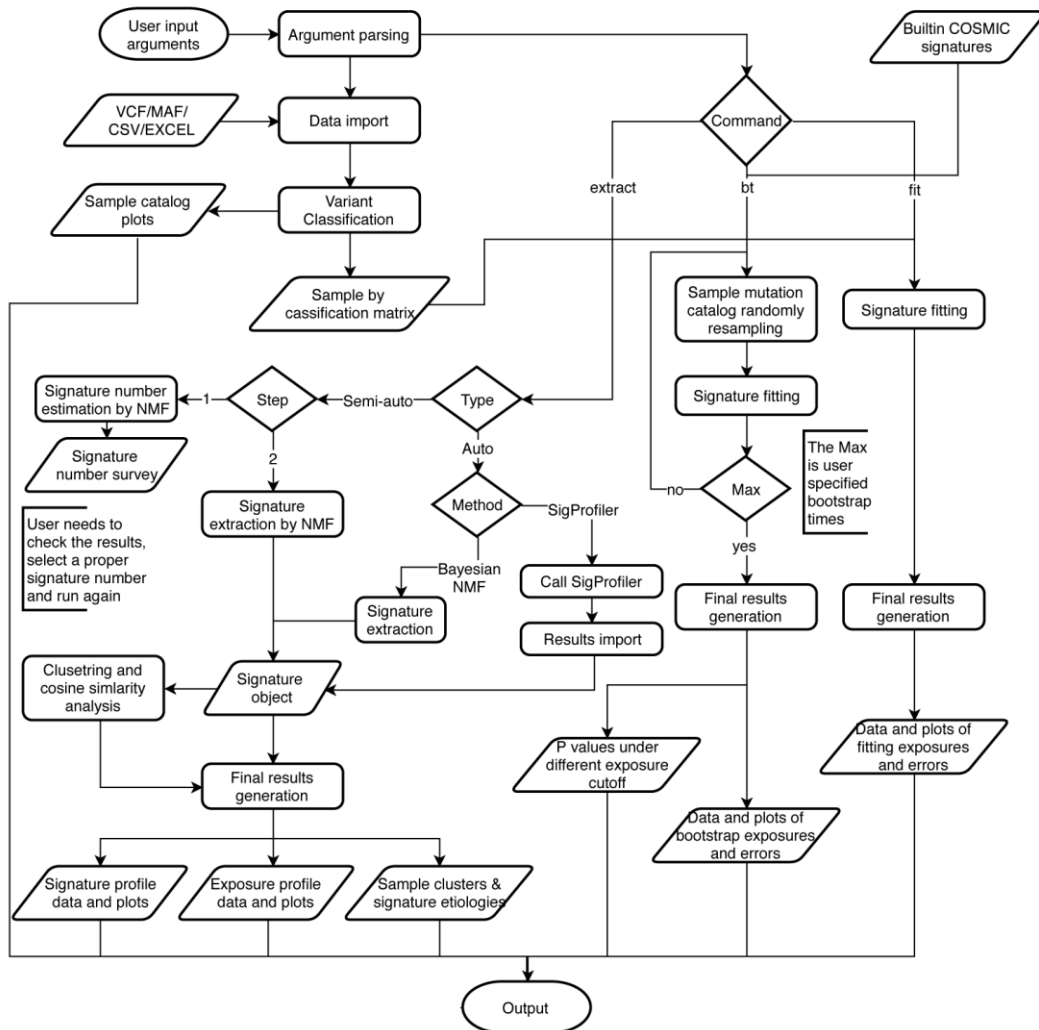

Fig. S1. Detailed flow chart of Sigflow.

Figure S2

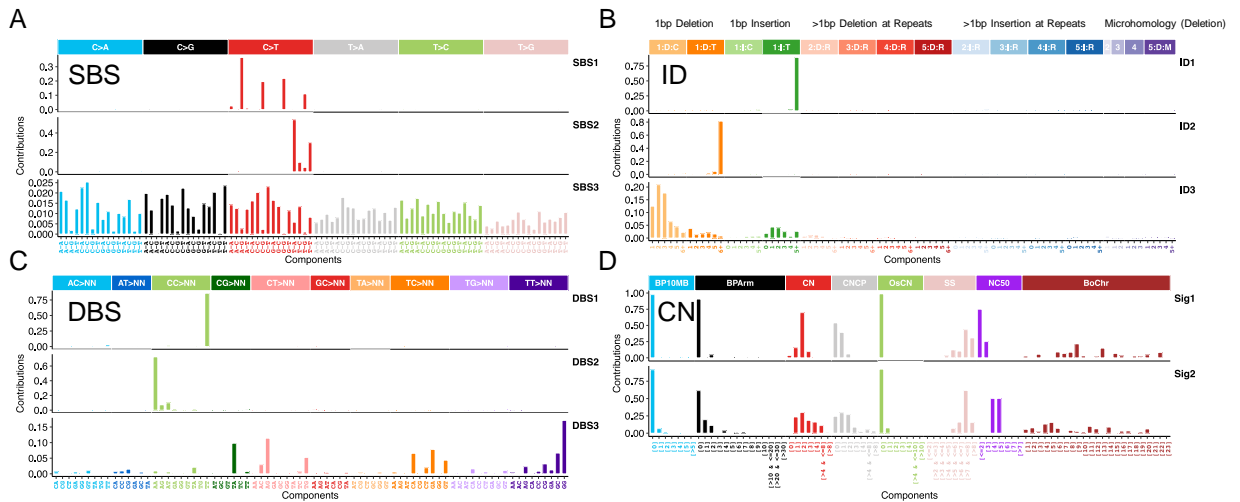

Fig. S2. Example signature profiles generated by Sigflow. First 3 signatures for mutational types including SBS (A), ID (B) and DBS (C) catalogued in COSMIC signature v3 database (<https://cancer.sanger.ac.uk/cosmic/signatures>) are shown. (D) Profile of two copy number signatures extracted from 10 TCGA samples is shown. Abbr.: SBS, single base substitution; DBS, doublet base substitution; ID, insertion and deletion; CN, copy number.

Figure S3

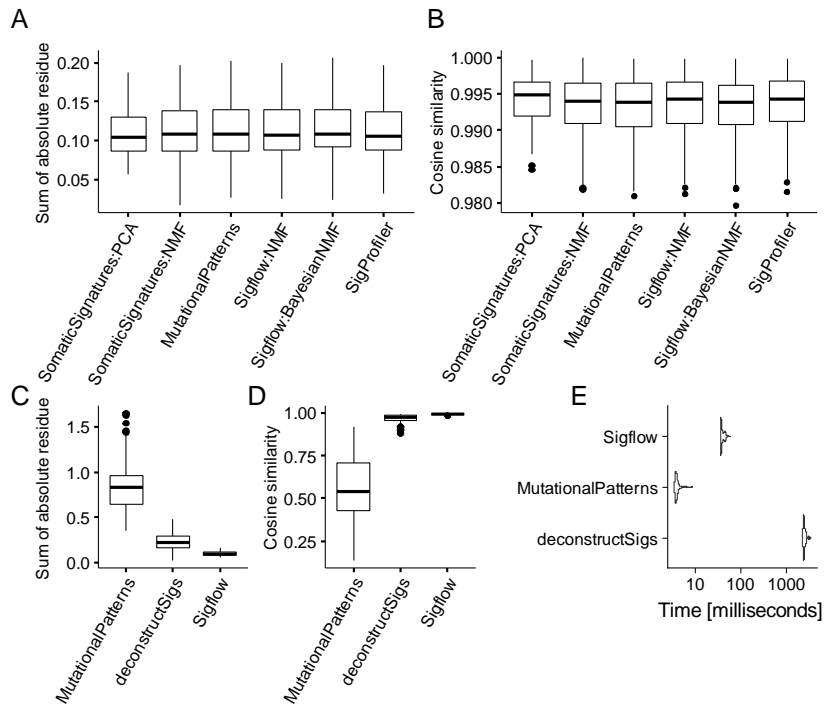

Fig. S3. Performance comparison in SBS signature extraction and fitting between Sigflow and other commonly used approaches with 214 PCAWG breast tumors. Distribution of error (A) and cosine similarity (B) between observed and reconstructed mutation spectrum in *de novo* signature extraction. Distribution of error (C) and cosine similarity (D) between observed and reconstructed mutation spectrum in reference signature fitting. Reference signatures are SBS signatures from COSMIC signature v3 database (<https://cancer.sanger.ac.uk/cosmic/signatures>). (E) Distribution of fitting time for single sample. The computation was repeated by 100 times. Here, Sigflow takes extra time to print the detailed information about program progress, so the speed is slower than MutationalPatterns.

Figure S4

A

| Run | Signature number | Posterior (log(e) transformed) |
|-----|------------------|--------------------------------|
| 20  | 13               | -13481.43071975890             |
| 14  | 13               | -13482.900913046700            |
| 3   | 14               | -13879.256323790000            |
| 8   | 14               | -13980.186397149100            |
| 18  | 15               | -14208.742754524600            |
| 12  | 15               | -14212.198381532200            |
| 13  | 15               | -14218.327880046800            |
| 9   | 15               | -14221.33654585160             |
| 10  | 15               | -14221.74220450850             |
| 2   | 15               | -14229.04225343580             |
| 11  | 15               | -14232.707494554600            |
| 5   | 15               | -14235.023136448400            |
| 6   | 15               | -14238.73360582180             |
| 1   | 15               | -14259.25965695080             |
| 7   | 15               | -14334.513048630400            |
| 15  | 16               | -14603.115175310500            |
| 19  | 16               | -14712.99807645120             |
| 4   | 16               | -14732.01230457900             |
| 17  | 17               | -15098.230327010300            |
| 16  | 17               | -15122.315211541100            |

B

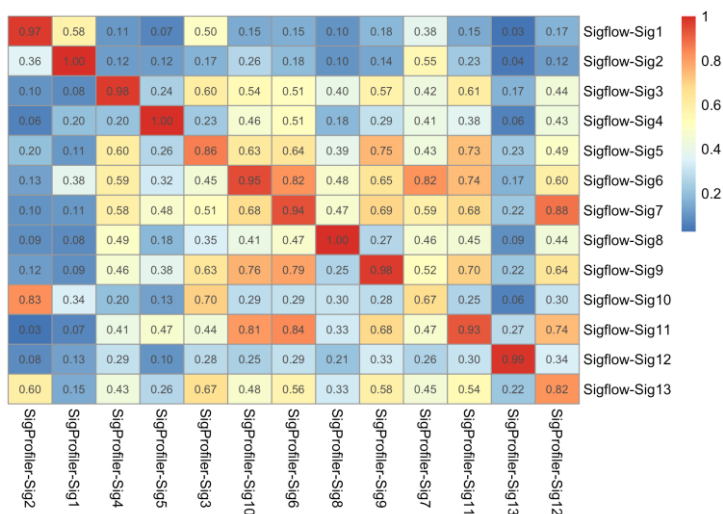

Fig. S4. Sigflow Bayesian NMF approach automatically extract 13 signatures from 214 PCAWG breast tumors with 20 runs. (A) Bayesian NMF run summary. The No. 20 run is selected as the optimal solution due to its maximum posterior probability. (B) The cosine similarity analysis between the 13 signatures extracted by Sigflow and the 13 signatures extracted by SigProfiler.
